# Supplementary material
Source: publisher figshare collection journal article supplement (https://brill.figshare.com/ndownloader/files/39014120)
Supplement: Supplementary file 1 [file 39014120]

# **Tool assisted task on touchscreen: a case study on drawing behaviour in chimpanzees (*Pan troglodytes*)**

Lison Martinet<sup>1</sup>, Cédric Sueur<sup>1,2,\*</sup>, Tetsuro Matsuzawa<sup>3,4</sup>, Satoshi Hirata<sup>5</sup>,  
Naruki Morimura<sup>5</sup> and Marie Pelé<sup>6</sup>

<sup>1</sup>Université de Strasbourg, CNRS, IPHC UMR 7178, 67087 Strasbourg, France

<sup>2</sup>Institut Universitaire de France, 75006 Paris, France

<sup>3</sup>Department of Pedagogy, Chubu Gakuin University, Gifu 504-8037, Japan

<sup>4</sup>Division of Humanities and Social Sciences, California Institute of Technology, Pasadena, CA  
91125, USA

<sup>5</sup>Wildlife Research Center, Kyoto University, Sakyo-ku, Kyoto 606-8203, Japan

<sup>6</sup>ETHICS EA 7446, Université Catholique de Lille, 59000 Lille, Hauts-de-France, France

\*Corresponding author; e-mail: cedric.sueur@iphc.cnrs.fr

**Supplementary material**

**Video S1.** Short sequences of drawing sessions of Pan and Ai (attached video file):

<https://youtu.be/ZhDv2eT4G4c>

**Table S1.** Drawings, duration and tools used by the two Primate Research Institute females, Ai and Pan, during the test sessions using their fingers (F), longer chopstick (LC), shorter chopstick (SC), wooden stick (W) and metal bar (MB). Different tools were used for some drawings.

| Days  | Individuals | Drawings                                                                            | Drawing made with | Drawing duration (minutes and seconds) |
|-------|-------------|-------------------------------------------------------------------------------------|-------------------|----------------------------------------|
| Day 1 | Ai          | 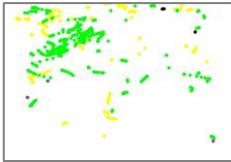 | FINGER            | 3 min and 17 sec                       |
|       |             |  | FINGER            | 35 sec                                 |
|       | Pan         |  | FINGER            | 2 min and 19 sec                       |
|       |             |  | FINGER            | 1 min and 7 sec                        |

|       |     |                                                                                     |                     |                     |
|-------|-----|-------------------------------------------------------------------------------------|---------------------|---------------------|
|       |     |    | LONGER<br>CHOPSTICK | 3 min and 46<br>sec |
|       |     |    | LONGER<br>CHOPSTICK | 5 min and 35<br>sec |
| Day 2 | Ai  |    | LONGER<br>CHOPSTICK | 40 sec              |
|       |     |  | FINGER              | 3 min and 2 sec     |
|       |     |  | LONGER<br>CHOPSTICK | 1 min and 30<br>sec |
|       | Pan |  | LONGER<br>CHOPSTICK | 8 min and 34<br>sec |
|       |     |  | LONGER<br>CHOPSTICK | 7 min and 57<br>sec |

|       |     |                                                                                     |                                 |                             |
|-------|-----|-------------------------------------------------------------------------------------|---------------------------------|-----------------------------|
| Day 3 | Ai  | 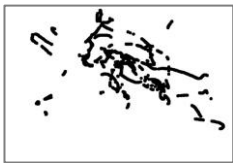   | METAL BAR                       | 47 sec                      |
|       |     |    | METAL BAR                       | 1 min and 22 sec            |
|       |     |    | METAL BAR                       | 2 min and 8 sec             |
|       | Pan |  | WOODEN STICK - LONGER CHOPSTICK | 47 sec –<br>4 min and 8 sec |
|       |     |  | LONGER CHOPSTICK                | 3 min and 56 sec            |
|       |     |  | LONGER CHOPSTICK                | 2 min and 14 sec            |
|       |     |  | SHORTER CHOPSTICK               | 1 min and 13 sec            |

|       |     |                                                                                     |                     |                     |
|-------|-----|-------------------------------------------------------------------------------------|---------------------|---------------------|
|       |     |    | WOODEN<br>STICK     | 5 min and 18<br>sec |
| Day 4 | Ai  |    | METAL BAR           | 3 min and 40<br>sec |
|       |     |    | METAL BAR           | 4 min and 29<br>sec |
|       |     |   | METAL BAR           | 3 min and 50<br>sec |
|       | Pan |  | LONGER<br>CHOPSTICK | 6 min and 1 sec     |
|       |     |  | WOODEN<br>STICK     | 5 min and 16<br>sec |
|       |     |  | LONGER<br>CHOPSTICK | 3 min and 32<br>sec |

|       |     |                                                                                     |                     |                     |
|-------|-----|-------------------------------------------------------------------------------------|---------------------|---------------------|
|       |     | 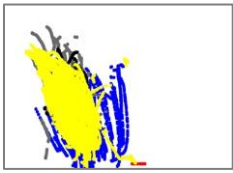   | WOODEN<br>STICK     | 4 min               |
| Day 5 | Ai  | Drawing not<br>available                                                            | METAL BAR           | 2 min and 4 sec     |
|       |     |    | METAL BAR           | 2 min and 36<br>sec |
|       |     |   | METAL BAR           | 1 min and 51<br>sec |
|       |     |  | METAL BAR           | 2 min and 52<br>sec |
|       | Pan |  | LONGER<br>CHOPSTICK | 3 min and 22<br>sec |
|       |     |  | LONGER<br>CHOPSTICK | 3 min and 49<br>sec |

|       |     |                                                                                     |                     |                     |
|-------|-----|-------------------------------------------------------------------------------------|---------------------|---------------------|
|       |     | 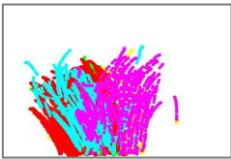   | LONGER<br>CHOPSTICK | 3 min and 40<br>sec |
|       |     |    | LONGER<br>CHOPSTICK | 4 min and 32<br>sec |
| Day 6 | Ai  |    | METAL BAR           | 3 min and 39<br>sec |
|       |     |   | METAL BAR           | 4 min and 33<br>sec |
|       |     |  | METAL BAR           | 3 min and 41<br>sec |
|       |     |  | METAL BAR           | 2 min and 33<br>sec |
|       | Pan |  | LONGER<br>CHOPSTICK | 2 min and 12<br>sec |

|  |  |                                                                                   |                                                                        |                                              |
|--|--|-----------------------------------------------------------------------------------|------------------------------------------------------------------------|----------------------------------------------|
|  |  | 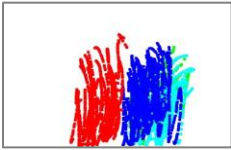 | SHORTER<br>CHOPSTICK                                                   | 1 min and 59<br>sec                          |
|  |  |  | METAL BAR -<br>LONGER<br>CHOPSTICK                                     | 1 min and 36<br>sec –<br>1 min and 25<br>sec |
|  |  |  | LONGER<br>CHOPSTICK –<br>SHORTER<br>CHOPSTICK -<br>LONGER<br>CHOPSTICK | 25 sec –<br>1 min and 33<br>sec – 36 sec     |

**Table S2.** Pairwise comparisons of the percentage of time spent drawing between females, using a Kruskal-Wallis test (chi-squared = 34.1, df = 6, p-value < 0.0001). The Shaded boxes indicate significant results.

|         | Ai         | Hatsuka    | Iroha      | Misaki     | Mizuki     | Natsuki    |
|---------|------------|------------|------------|------------|------------|------------|
| Hatsuka | p = 0.0356 | —          | —          | —          | —          | —          |
| Iroha   | p = 0.0074 | p = 0.0356 | —          | —          | —          | —          |
| Misaki  | p = 1.0000 | p = 0.0728 | p = 0.0356 | —          | —          | —          |
| Mizuki  | p = 0.0256 | p = 1.0000 | p = 0.0356 | p = 0.0728 | —          | —          |
| Natsuki | p = 0.0356 | p = 0.644  | p = 0.1234 | p = 0.1758 | p = 0.9415 | —          |
| Pan     | p = 0.8194 | p = 0.0055 | p = 0.0055 | p = 0.9415 | p = 0.0055 | p = 0.0062 |

**Table S3.** Pairwise comparisons of the average time spent drawing (i.e., marking duration) between females, using Kruskal-Wallis test (chi-squared = 39.8, df = 6, p-value < 0.0001). Shaded boxes indicate significant results.

|         | Ai         | Hatsuka    | Iroha      | Misaki     | Mizuki     | Natsuki    |
|---------|------------|------------|------------|------------|------------|------------|
| Hatsuka | p = 0.1246 | —          | —          | —          | —          | —          |
| Iroha   | p = 0.0291 | p = 0.0193 | —          | —          | —          | —          |
| Misaki  | p = 0.2259 | p = 0.7546 | p = 0.0513 | —          | —          | —          |
| Mizuki  | p = 0.0193 | p = 0.0193 | p = 0.7252 | p = 0.0676 | —          | —          |
| Natsuki | p = 0.0364 | p = 0.0266 | p = 0.7321 | p = 0.0727 | p = 0.7546 | —          |
| Pan     | p = 0.0193 | p = 0.0004 | p = 0.0008 | p = 0.0030 | p < 0.0001 | p = 0.0002 |

**Table S4.** Pairwise comparisons of the percentage of time spent looking at the screen between females made using a Kruskal-Wallis test (chi-squared = 46.4, df = 6, p-value < 0.0001). Shaded boxes indicate statistically significant results.

|         | Ai         | Hatsuka    | Iroha      | Misaki     | Mizuki     | Natsuki    |
|---------|------------|------------|------------|------------|------------|------------|
| Hatsuka | p = 0.1300 | –          | –          | –          | –          | –          |
| Iroha   | p = 0.0319 | p = 0.0340 | –          | –          | –          | –          |
| Misaki  | p = 0.0144 | p = 0.0262 | p = 0.1533 | –          | –          | –          |
| Mizuki  | p = 1.0000 | p = 0.0862 | p = 0.0862 | p = 0.0333 | –          | –          |
| Natsuki | p = 0.0262 | p = 0.0319 | p = 0.2357 | p = 0.5636 | p = 0.0440 | –          |
| Pan     | p < 0.0001 | p = 0.0262 | p = 0.0067 | p = 0.0043 | p = 0.0144 | p = 0.0022 |

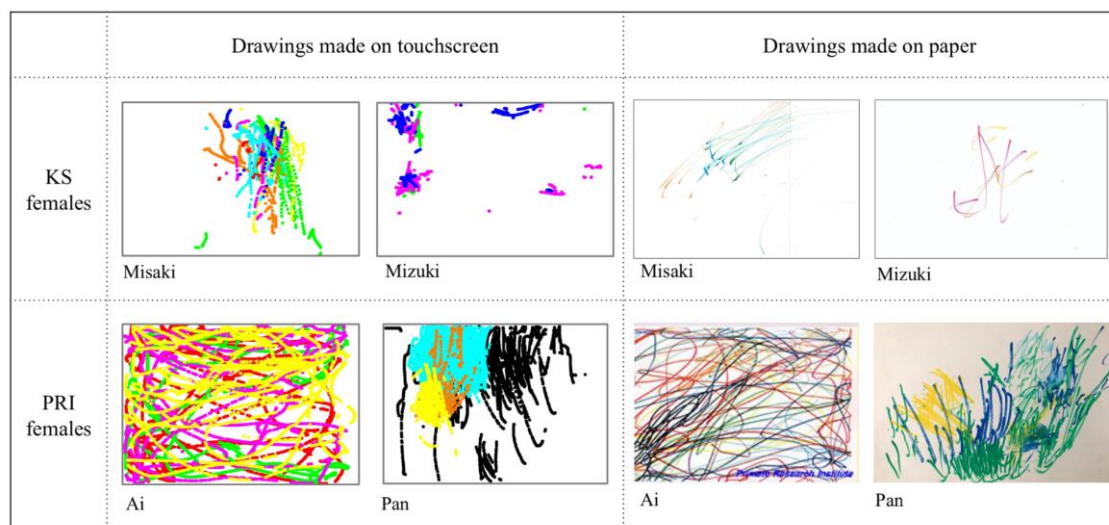

**Figure S1.** Examples of drawings made with pencils on paper and drawings made on the touchscreen by KS and PRI females. Drawings made on paper by Ai were provided by the University of Kyoto and those made by Pan with markers were provided by Tetsuro Matsuzawa.

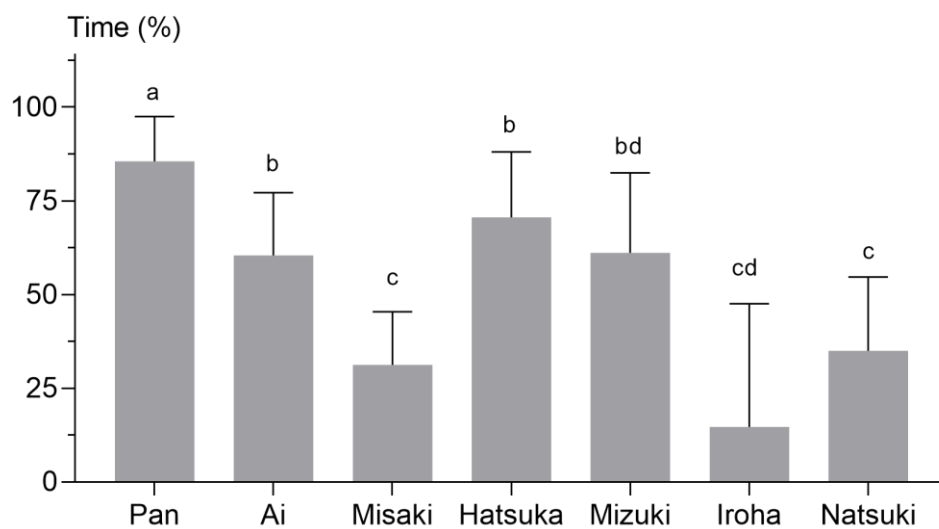

**Figure S2.** Percentage time spent looking at the screen while drawing. Letters indicates similar values (e.g., no statistical differences between two subjects).

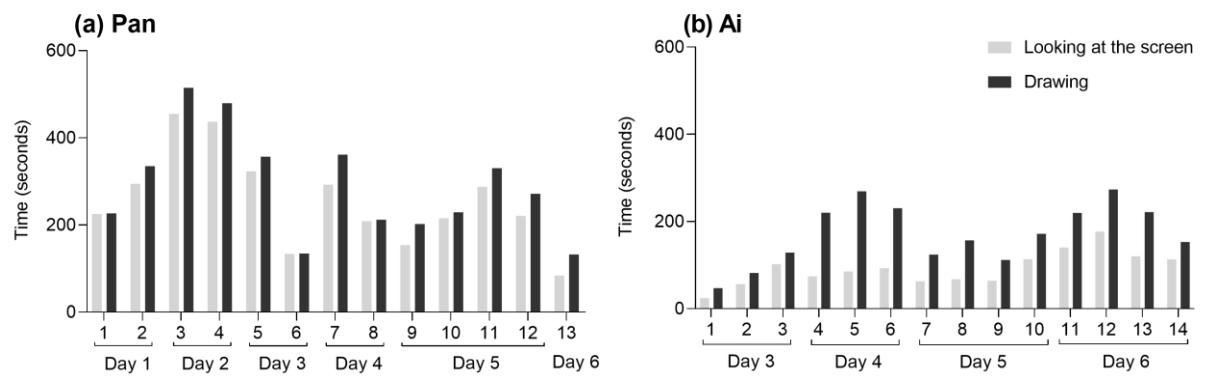

**Figure S3.** Time spent drawing and looking at the screen (seconds) for each drawing made with the selected tool by (a) Pan, who began to draw with the long chopstick from the Day 1 and (b) Ai, who began using the metal bar only on Day 3.
